# Supplementary material
Source: publisher figshare collection journal article supplement (https://wiley.figshare.com/articles/dataset/_/3529124)
Supplement: Supplementary file 1 [file 1]

**Ethan P. White, Brian J. Enquist, and Jessica L. Green. 2008. On estimating the exponents of power-law frequency distributions. *Ecology* 89:905-912.**

Appendix A. Details of logarithmic binning, cumulative distribution function fitting, and maximum likelihood estimation.

Why simple logarithmic binning estimates  $\lambda+1$

By definition a bin of constant logarithmic width means that the logarithm of the upper edge of a bin ( $x_{i+1}$ ) is equal to the logarithm of the lower edge of that bin ( $x_i$ ) plus the bin width ( $b$ ). That is,

$$\begin{aligned}\log(x_{i+1}) &= \log(x_i) + b \\ \Rightarrow x_{i+1} &= e^{(\log(x_i) + b)} = e^{\log(x_i)} e^b = x_i e^b\end{aligned}$$

Since the linear bin width of bin  $i$ ,  $w_i$ , is defined as

$$w_i = x_{i+1} - x_i$$

the linear bin width is directly proportional to  $x_i$  because

$$w_i = x_i e^b - x_i = x_i (e^b - 1).$$

The number of observations in a bin ( $n$ ) is equal to the density of observations in that bin times the width of that bin. Therefore if the probability density function,  $f(x) \propto x^{-\lambda}$  and the width of the bin,  $w \propto x$ , then

$$n \propto x^{-\lambda} x = x^{-\lambda+1} = x^{1-\lambda}$$

and regressing  $\log(n)$  against  $\log(x)$  yields a slope equal to  $1-\lambda$ , not  $\lambda$ . If  $n$  is divided by the linear width of the bin then,

$$\begin{aligned}\frac{n}{w} &\propto \frac{x^{-\lambda} x}{x} \\ &\propto x^{-\lambda}\end{aligned}$$

and thus a regression of the normalized logarithmic bin counts against the logarithm of  $x$  will estimate  $\lambda$ .

Linearizations of the cumulative distribution functions

| Distribution                  | CDF                                                                   | Linearization of CDF                                            |
|-------------------------------|-----------------------------------------------------------------------|-----------------------------------------------------------------|
| Pareto <sup>1</sup>           | $1 - a^{-(\lambda+1)} x^{\lambda+1}$                                  | $\log(1 - F(x)) = -(\lambda + 1)\log(a) + (\lambda + 1)\log(x)$ |
| Truncated Pareto <sup>2</sup> | $\frac{x^{\lambda+1} - a^{\lambda+1}}{b^{\lambda+1} - a^{\lambda+1}}$ | -----                                                           |
| Discrete Pareto <sup>2</sup>  | $\frac{\sum_{j=a}^x j^{\lambda}}{\zeta(-\lambda, a)}$                 | -----                                                           |
| Power Function <sup>1</sup>   | $(x/b)^{\lambda+1}$                                                   | $\log(F(x)) = -(\lambda + 1)\log(b) + (\lambda + 1)\log(x)$     |

<sup>1</sup> Typically the linearization of the CDF is then fit using simple linear regression. This ignores the fact that the intercept is also a function of lambda, or alternatively that the CDF at the minimum attainable value of x must be equal to 0. This could be dealt with using non-linear regression, but this is not done in the ecological literature.

<sup>2</sup>There is no obvious way to isolate  $\lambda$  as a simple component of the slope for these distributions.

#### Confidence intervals for maximum likelihood estimates

Solutions for the standard error (SE) of the estimated value of  $\lambda^1$ . Estimates of the SE can also be obtained using the bootstrap or jackknife techniques (Newman 2005).

| Distribution                 | SE of MLE                                                                                                                                                                     |
|------------------------------|-------------------------------------------------------------------------------------------------------------------------------------------------------------------------------|
| Pareto                       | $\frac{(-\hat{\lambda} - 1)}{\sqrt{n}}$                                                                                                                                       |
| Truncated Pareto             | $\frac{1}{\sqrt{n}} \left( \frac{1}{\hat{\lambda}^2} - \frac{(b/a)^{-\hat{\lambda}} [\ln(b/a)]^2}{[1 - (b/a)^{-\hat{\lambda}}]^2} \right)^{\frac{1}{2}}$                      |
| Discrete Pareto <sup>2</sup> | $\frac{1}{\sqrt{n \left[ \frac{\zeta''(-\hat{\lambda}, a)}{\zeta(-\hat{\lambda}, a)} - \left( \frac{\zeta'(-\hat{\lambda}, a)}{\zeta(-\hat{\lambda}, a)} \right)^2 \right]}}$ |
| Power Function               | $\frac{\hat{\lambda} + 1}{\sqrt{n}}$                                                                                                                                          |

<sup>1</sup>Source: Pareto (Clauset et al. 2007); Truncated Pareto (Aban et al. 2006); Discrete Pareto (Clauset et al. 2007); Power Function (JLG). Solutions for SE are in the limit of

large  $n$ . It is possible to correct the SE for small  $n$  and solutions for this correction are available for the Pareto distribution (Johnson et al. 1994, Newman 2005, Clauset et al. 2007).

<sup>2</sup>The estimates of the SE for the Pareto distribution can be used as an approximation for the Discrete Pareto for reasonably large  $n$  and  $a$  (Clauset et al. 2007).

Aban, I. B., M. M. Meerschaert, and A. K. Panorska. 2006. Parameter estimation for the truncated pareto distribution. *Journal Of The American Statistical Association* **101**:270-277.

Clauset, A., C. R. Shalizi, and M. E. J. Newman. 2007. Power-law distributions in empirical data. arXiv:0706.1062v1 [physics.data-an].

Johnson, N. L., S. Kotz, and N. Balakrishnan. 1994. *Continuous Univariate Distributions: Volume 1*, 2nd edition. Wiley-Interscience, New York.

Newman, M. E. J. 2005. Power laws, Pareto distributions and Zipf's law. *Contemporary Physics* **46**:323-351.

---

---
